# Supplementary material
Source: ML conference proceedings conference paper supplement (https://proceedings.neurips.cc/paper_files/paper/2022/hash/71c31ebf577ffdad5f4a74156daad518-Abstract.html)
Supplement: Supplementary file 1 [file 71c31ebf577ffdad5f4a74156daad518-Supplemental-Conference.zip]

Archive with 3 entries (2 files):
- camera_ready_suppl/
- camera_ready_suppl/camera_ready_app.pdf
- camera_ready_suppl/codebase.zip
